# Supplementary material for: Ageing Curtails the Diversity and Functionality of Nascent CD8+ T Cell Responses against SARS-CoV-2
Source: MDPI journal article supplement (doi:10.3390/vaccines11010154), 2023-01-11
Supplement: s1 [file s1]

# Supplementary Materials:

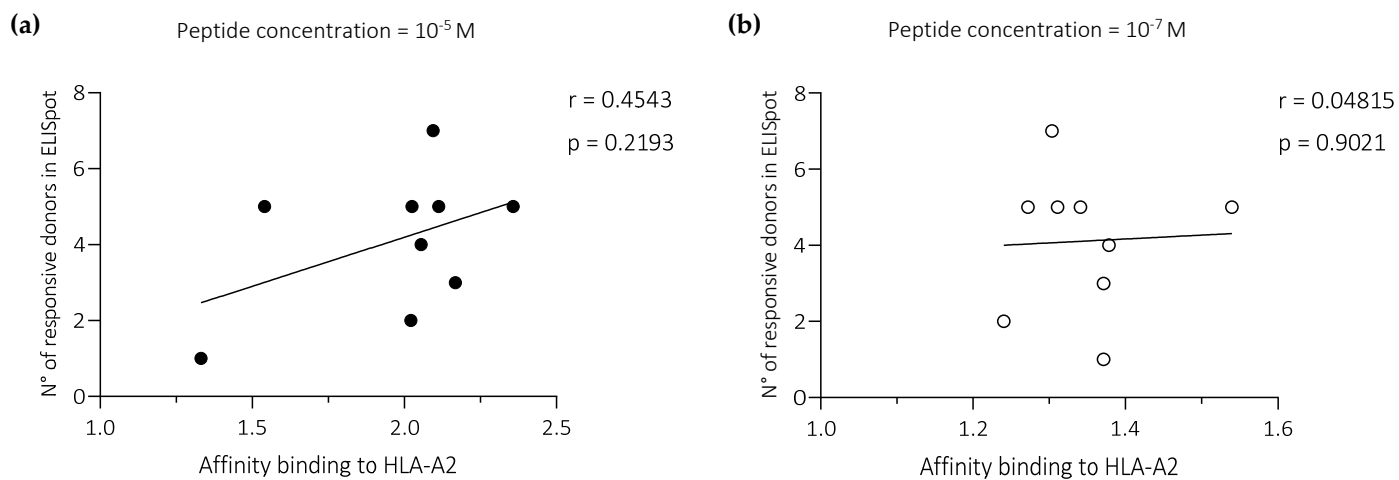

**Figure S1.** Correlation between peptide binding affinity and immunoprevalence. Affinity binding to HLA-A2 was calculated for each peptide at  $10^{-5}$  M **(a)** or  $10^{-7}$  M **(b)** and correlated with the number of responsive donors as determined using ELISpot assays to capture IFN- $\gamma$ . Significance was determined using the Pearson correlation coefficient.
